# Supplementary material for: Bifidobacterium animalis subsp. lactis BLa80 alleviates constipation in mice through modulating the stem cell factor (SCF)/c-Kit pathway and the gut microbiota
Source: Royal Society of Chemistry journal article supplement (doi:10.1039/d4fo06350c), 2025-01-01
Supplement: d4fo06350c1.pdf [file d4fo06350c1.pdf]

### Support Information

**Table S1** Sequence and annealing temperature of primer

| Gene                  | Primer sequence (5'-3')     | Annealing temperature |
|-----------------------|-----------------------------|-----------------------|
| <b><i>β</i>-actin</b> | F:TGGAATCCTGTGGCATCCATGAAAC | 60°C                  |
|                       | R:TAAAACGCAGCTCAGTAACAGTCC  |                       |
|                       | G                           |                       |
| <b>AQP3</b>           | F:TTGGTGGCTGGCCAAGTGTC      | 60°C                  |
|                       | R:GTCTGTGCCAGTGCATAGAT      |                       |
| <b>MUC2</b>           | F:GCTGACGAGTGGTTGGTGAATG    | 60°C                  |
|                       | R:GATGAGGTGGCAGACAGGAGAC    |                       |
| <b>SCF</b>            | F:GAATCTCCGAAGAGGCCAGAA     | 60°C                  |
|                       | R:GCTGCAACAGGGGGTAACAT      |                       |
| <b>c-Kit</b>          | F:TCATCGAGTGTGATGGGAAA      | 60°C                  |
|                       | R:TCACAGGGGAGATGTTGATG      |                       |



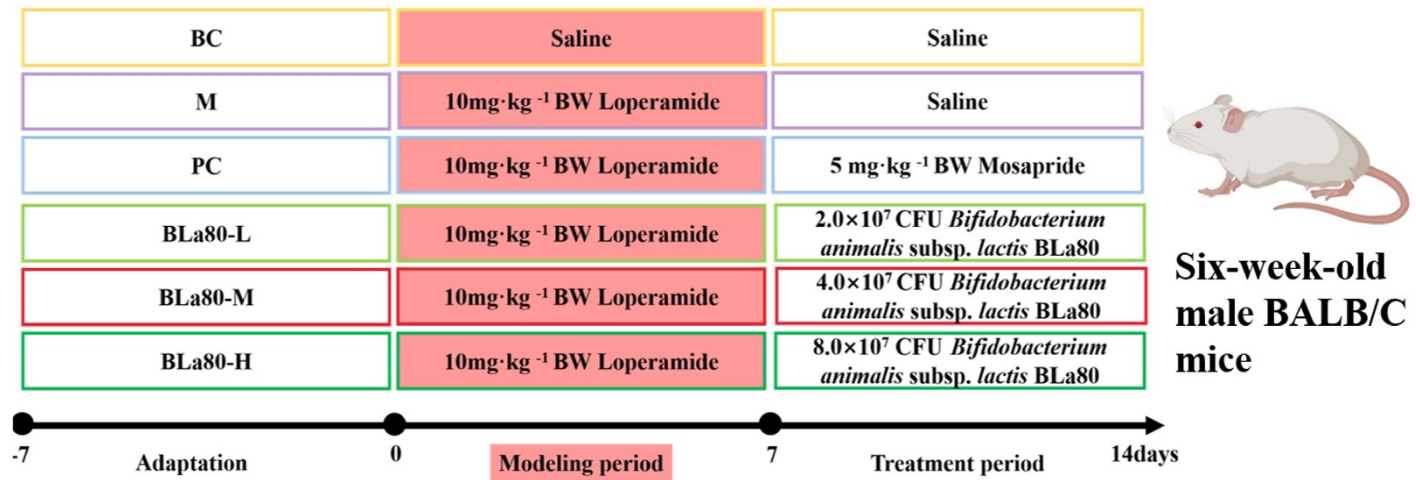

**Figure S1** Establishment of the mouse model
